# Supplementary material
Source: publisher site journal article supplement (https://www.kjim.org/upload/media/kjim-2022-249_suppl4.pdf)
Supplement: Supplementary file 1 [file kjim-2022-249_suppl4.pdf]

**Supplementary Table 4. Relative risks of cardiovascular events in hypertensive group compared with non-hypertensive group over time.**

| Group                 | Relative risk (from the baseline) (95% CI) |                      |                      |                     |                     |                     |
|-----------------------|--------------------------------------------|----------------------|----------------------|---------------------|---------------------|---------------------|
|                       | 6 months                                   | 1 year               | 2 years              | 3 years             | 5 years             | 10 years            |
| Heart failure         | 7.2<br>(4.2–12.3)                          | 7.6<br>(5.6–10.2)    | 6.1<br>(5.1–7.5)     | 5.3<br>(4.5–6.2)    | 4.4<br>(3.9–5.0)    | 3.3<br>(3.0–3.6)    |
| Myocardial infarction | 28.3<br>(14.7–54.7)                        | 27.7<br>(19.2–39.9)  | 19.9<br>(15.4–25.7)  | 12.2<br>(9.8–15.1)  | 7.3<br>(6.1–8.7)    | 3.7<br>(3.2–4.3)    |
| PAD                   | 1.9<br>(1.1–3.2)                           | 1.5<br>(1.0–2.0)     | 1.4<br>(1.1–1.8)     | 1.3<br>(1.1–1.5)    | 1.2<br>(1.0–1.4)    | 1.0<br>(0.9–1.1)    |
| Hemorrhagic stroke    | 2.2<br>(0.5–10.3)                          | 1.9<br>(0.8–4.5)     | 1.7<br>(0.9–3.1)     | 1.7<br>(1.1–2.6)    | 1.5<br>(1.1–2.1)    | 1.5<br>(1.2–1.8)    |
| Ischemic stroke       | 23.3<br>(6.0–90.2)                         | 19.0<br>(8.8–40.8)   | 17.3<br>(10.2–29.2)  | 9.8<br>(6.3–15.1)   | 5.5<br>(3.7–7.9)    | 3.2<br>(2.3–4.4)    |
| ESRD                  | -                                          | 60.0<br>(13.4–268.0) | 43.3<br>(17.8–105.2) | 35.5<br>(18.2–69.2) | 33.2<br>(20.6–53.4) | 17.0<br>(12.7–22.8) |

CI, confidential interval; PAD, peripheral artery disease; ESRD, end stage renal disease.
